# Supplementary material
Source: publisher figshare collection journal article supplement (https://acs.figshare.com/ndownloader/files/4139707)
Supplement: Supplementary file 1 [file 4139707]

## SUPPLEMENTAL INFORMATION

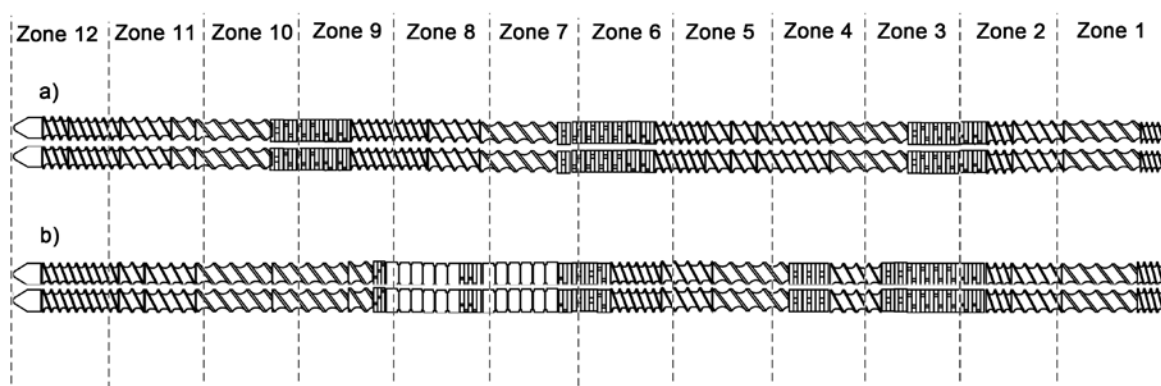

Figure 10. a) Low shear screw configuration, b) high shear configuration.

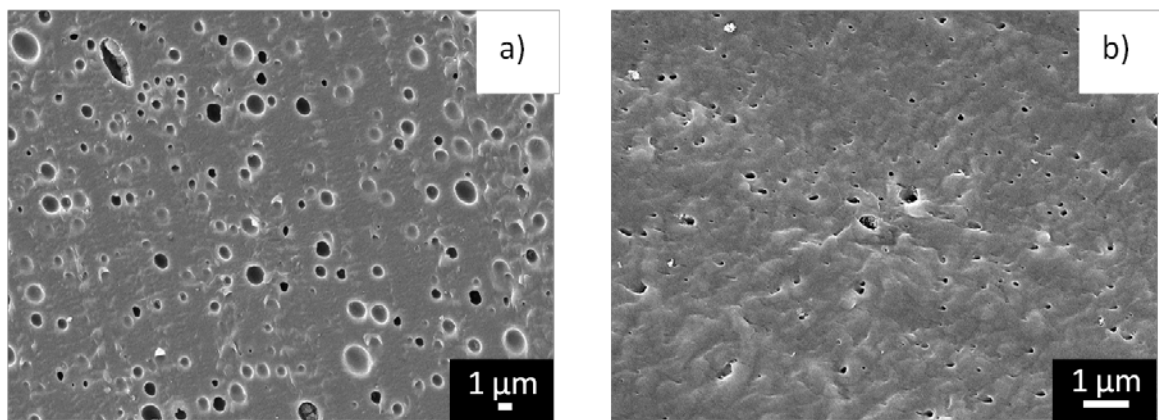

Figure 11. SEM micrographs of 92/8 vol% cocontinuous blends after PEO extraction: a) PE/PEO, b) PE-g-MA/PEO.
